# Supplementary material
Source: PubMed Central journal article supplement (PMC1948905)

1 2 3 4 5 6 7 8

116

66

45

35

25

18

14

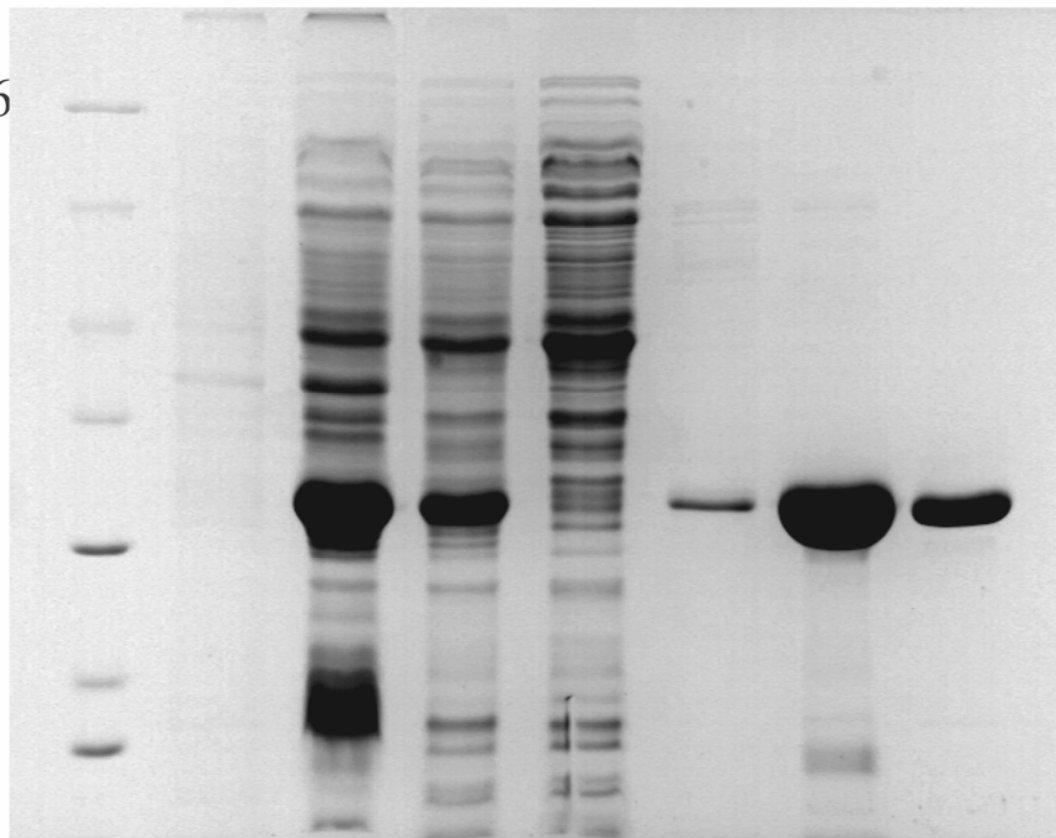

Supplement: pnas_0704338104_1.pdf [file pnas_0704338104_1.pdf]
